# Supplementary material for: Dual-targeting nanotheranostics for MRI-guided enhanced chemodynamic therapy of hepatoma via regulating the tumor microenvironment
Source: Royal Society of Chemistry journal article supplement (doi:10.1039/d3dt02715e), 2023-01-01
Supplement: d3dt02715e1.pdf [file d3dt02715e1.pdf]

## Supplementary Information

### **Dual-targeting nanotheranostics for MRI-guided enhanced chemodynamic therapy of hepatoma via regulating the tumor microenvironment**

Jinwu Liu,<sup>a,b†</sup> Hong Qu,<sup>b,d†</sup> Lifeng Hang,<sup>b†</sup> Yiqiang Sun,<sup>c</sup> Wuming Li,<sup>b</sup> Yiyu Chen,<sup>b</sup> Hong Li,<sup>d</sup> Wei Wen,<sup>\*e</sup> Yanqiu Feng<sup>\*a</sup> and Guihua Jiang<sup>\*b,d</sup>

<sup>a</sup>School of Biomedical Engineering, Southern Medical University, Guangzhou, P. R. China

<sup>b</sup>The Department of Medical Imaging, Guangzhou Key Laboratory of Molecular Functional Imaging and Artificial Intelligence for Major Brain Diseases, Guangdong Second Provincial General Hospital, Guangzhou 518037, P. R. China

<sup>c</sup> School of Chemistry and Chemical Engineering, University of Jinan, Jinan 250022, P. R. China.

<sup>d</sup>School of Medicine, Jinan University, Guangzhou, 510632, P. R. China

<sup>e</sup>College of Mechanical and Electrical Engineering, Hainan University, Haikou 570228, P. R. China

<sup>†</sup>These authors contributed equally to this work.

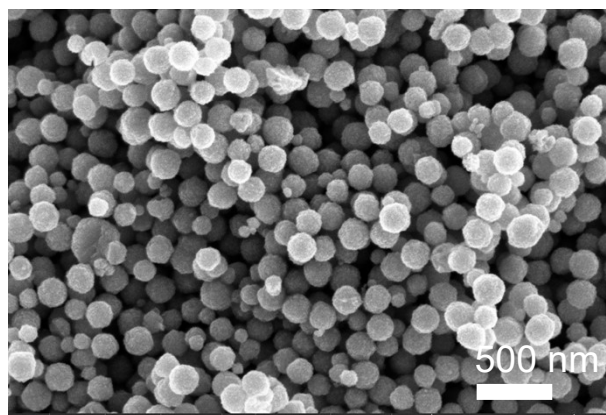

**Figure S1.** SEM image of Fe<sub>3</sub>O<sub>4</sub> NPs.

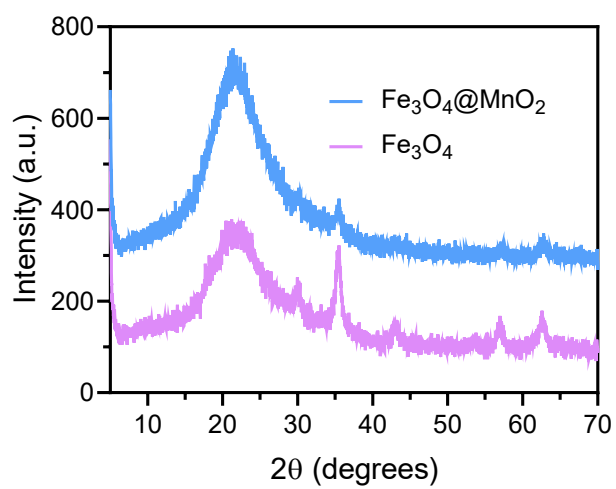

**Figure S2.** XRD patterns of Fe<sub>3</sub>O<sub>4</sub> NPs and Fe<sub>3</sub>O<sub>4</sub>@MnO<sub>2</sub>.

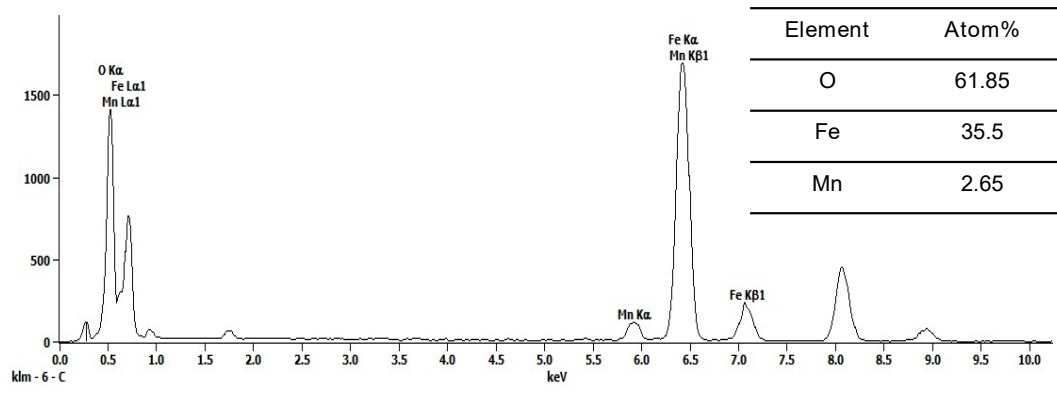

**Figure S3.** ESD spectrum of FM NPs.

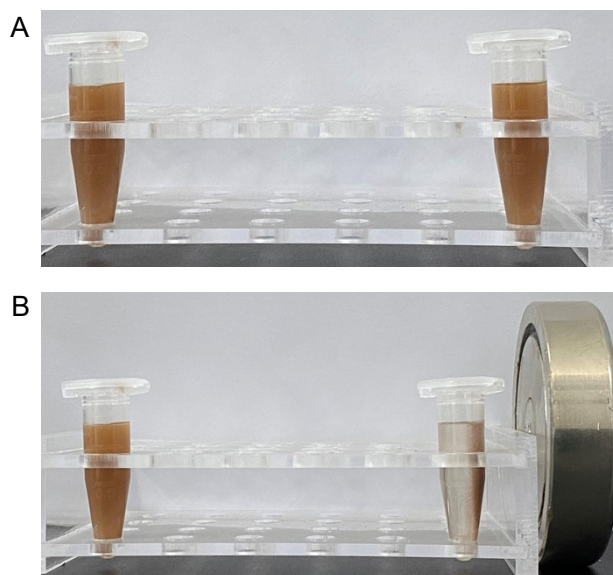

**Figure S4.** The photograph of FM@TCM NPs in PBS (A) and treated with external magnetic field (B).

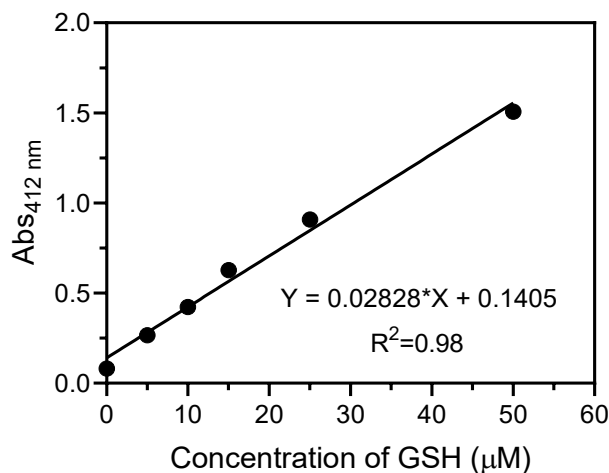

**Figure S5.** The standard linear relation of absorbance at 412 nm versus GSH concentration.

**Table S1.** IC<sub>50</sub> of similar materials on SMCC-7721 cells.

| Nanomedicine          | IC <sub>50</sub> (μg/mL) | Reference                                                          |
|-----------------------|--------------------------|--------------------------------------------------------------------|
| Au@PB NPs             | 76.6                     | <i>ACS Appl. Mater. Interfaces</i> , 2019, <b>11</b> , 39493–39502 |
| AFG/SFB@PEG           | 35                       | <i>Acta Biomater.</i> , 2023, <b>159</b> , 237–246                 |
| MSN@H6L@βCD@AMPPD NPs | 900                      | <i>ACS Appl. Bio Mater.</i> , 2021, <b>4</b> , 1740–1748           |
| NBOF@SOR-P-FA         | 80                       | <i>Adv. Healthcare Mater.</i> , 2020, <b>9</b> , 2000650           |
| SnS-PEG NSs           | 35                       | <i>J. Mater. Chem. B</i> , 2018, <b>6</b> , 4747-4755              |
| FM@TCM                | 20                       | In this work                                                       |

### References

1. L.Hang, H. Li, T. Zhang, D. Men, C. Zhang, P. Gao and Q. Zhang, *ACS Appl. Mater. Interfaces*, 2019, **11**, 39493-39502.
2. X. Wang, L. Zhao, C. Wang, L. Wang, H. Wu, X. Song, W. Wang, H. Xu and X. Dong, *Acta Biomater.*, 2023, **159**, 237-246.
3. N. Fan, P. Li, C. Wu, X. Wang, Y. Zhou and B. Tang, *ACS Appl. Bio Mater.*, 2021, **4**, 1740-1748.
4. G. Zhang, J. Liu, X. Yu, Y. Deng, Y. Sun, Ta. Liu, L. Dong, C. Zhu, X. Shen, J. Zhu, S. Weng and Y. Li, *Adv. Healthcare Mater.*, 2020, **9**, 2000650.
5. Z. Xie, D. Wang, T. Fan, C. Xing, Z. Li, W. Tao, L. Liu, S. Bao, D. Fan and H. Zhang, *J. Mater. Chem. B*, 2018, **6**, 4747-4755.

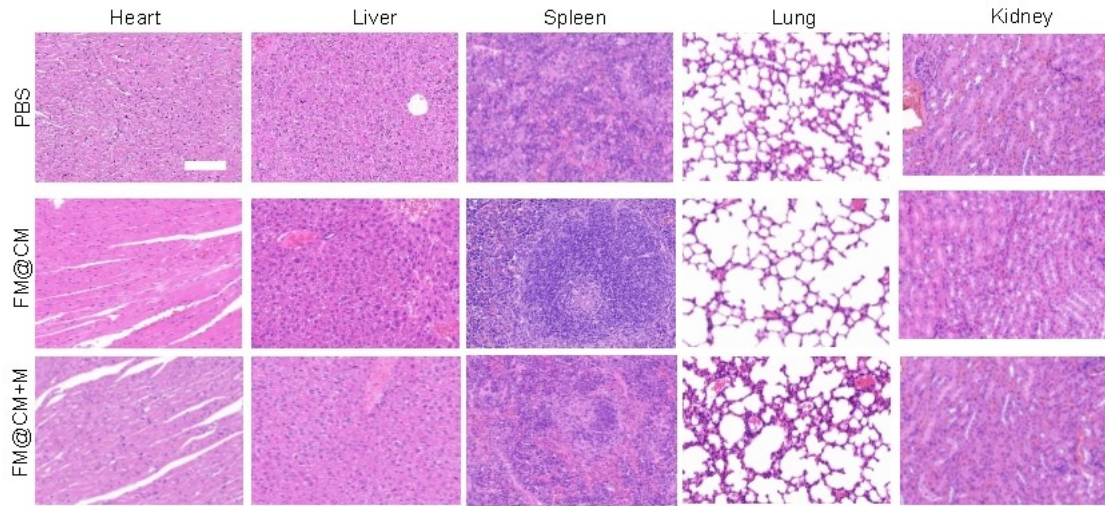

**Figure S6.** H&E staining of heart, liver, spleen, lung, and kidney in mice after treated with different groups.

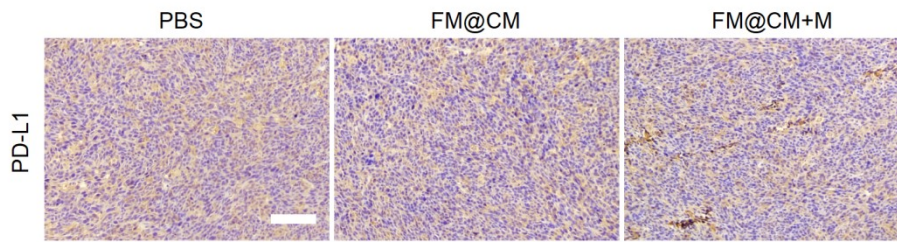

**Figure S7.** PD-L1 staining image of SMCC-7721 tumors after treated with different groups.
